# Supplementary material
Source: PubMed Central journal article supplement (PMC4916344)
Supplement: supp_afw066_afw066supp_file1.pdf [file supp_afw066_afw066supp_file1.pdf]

## Delirium Survey

1. On the acute take, what proportion of patients over the age of 75 have:

|                       | < 5% | 5 – 9% | 10 – 14% | 15 – 19% | > 20% |
|-----------------------|------|--------|----------|----------|-------|
| Delirium              |      |        |          |          |       |
| Depression            |      |        |          |          |       |
| Dementia              |      |        |          |          |       |
| Dementia and delirium |      |        |          |          |       |

2. Estimate the **one year mortality** for an average 70 year old woman:

|                                                             | < 5% | 5- 9% | 10- 24% | > 25% |
|-------------------------------------------------------------|------|-------|---------|-------|
| Duke's C colorectal carcinoma                               |      |       |         |       |
| Non-ST Elevation Myocardial Infarction with troponin of 15  |      |       |         |       |
| Delirium secondary to urinary sepsis                        |      |       |         |       |
| Bleeding duodenal ulcer from NSAID use                      |      |       |         |       |
| Three admissions for infective exacerbation of COPD in 6/12 |      |       |         |       |
| Delirium with pre-existing cognitive impairment             |      |       |         |       |
| Subarachnoid haemorrhage and GCS 13                         |      |       |         |       |
| Fractured neck of femur                                     |      |       |         |       |
| In a nursing home with Barthel score of 5/20                |      |       |         |       |

3. In what percentage of cases of delirium is a clear set of precipitating causes found?

| <10% | 10-25% | 25-50% | 50-75% | >75% |
|------|--------|--------|--------|------|
|      |        |        |        |      |

4. Using DSM-IV, which of the following features are essential to diagnosis delirium:

|                        |       |                          |       |
|------------------------|-------|--------------------------|-------|
| disorientation in time | T / F | visual hallucinations    | T / F |
| agitation              | T / F | altered sleep-wake cycle | T / F |
| inattention            | T / F | altered mood             | T / F |
| acute onset            | T / F | disorganised thinking    | T / F |
| altered arousal        | T / F |                          |       |

5. I have used validated delirium assessment tools T / F

6. What is the relative risk of the following developing **in one year** from an episode of delirium in a patient over the age of 65?

|                      | 1x | 2x | 3x | 5x | 10x |
|----------------------|----|----|----|----|-----|
| Dementia             |    |    |    |    |     |
| Institutionalisation |    |    |    |    |     |
| Delaying discharge   |    |    |    |    |     |
| Death                |    |    |    |    |     |

|                                                                                         | Strongly disagree | Disagree | Neither agree nor disagree | Agree | Strongly agree |
|-----------------------------------------------------------------------------------------|-------------------|----------|----------------------------|-------|----------------|
| I have a good working knowledge of the diagnostic criteria for acute coronary syndromes |                   |          |                            |       |                |
| I have a good working knowledge of the diagnostic criteria for pneumonia                |                   |          |                            |       |                |
| I have a good working knowledge of the diagnostic criteria for acute pancreatitis       |                   |          |                            |       |                |
| I have a good working knowledge of the diagnostic criteria for delirium                 |                   |          |                            |       |                |
| Delirium is a medical emergency                                                         |                   |          |                            |       |                |
| Delirium is an extensive and prevalent problem                                          |                   |          |                            |       |                |
| Delirium in acute medical settings is under-recognised                                  |                   |          |                            |       |                |
| Delirium is partly preventable                                                          |                   |          |                            |       |                |
| Being skilled in delirium diagnosis makes a difference to clinical outcomes             |                   |          |                            |       |                |
| Benzodiazepines are first line treatments for delirium                                  |                   |          |                            |       |                |
| Delirium is distressing for patients                                                    |                   |          |                            |       |                |
| Delirium is distressing for relatives                                                   |                   |          |                            |       |                |
| I am confident at managing delirium                                                     |                   |          |                            |       |                |
| Delirium is a treatable condition                                                       |                   |          |                            |       |                |
| Staffing constraints often result in the over-use of pharmacological therapy            |                   |          |                            |       |                |

Date                      Centre                      Grade

Year of qualification

Number of months postgraduate experience in:

Neurology

Geriatrics

Psychiatry

Current subspecialty post

Career plans
